# Supplementary material
Source: PubMed Central journal article supplement (PMC6995282)
Supplement: NIHMS1547766-supplement-Supp_1.pdf [file NIHMS1547766-supplement-Supp_1.pdf]

## **Supplemental 1**

We are graduate students from the Department of Biological Sciences, The University of Delaware. We work with Dr. Melinda Duncan (<http://www.bio.udel.edu/users/mduncan>), and our research focus is based on identifying the molecular mechanisms behind the side effects of cataract surgery notably post-cataract surgery inflammation and posterior capsular opacification (PCO). Recently our lab has identified two novel molecular targets responsible for the post-cataract surgery inflammation and PCO. However, it is of paramount importance to see if these molecules have commercial viability in the market or not. Notably, we were funded by the NSF I-corps program (<http://www.udel.edu/research-innovation/horn/venture-support/nsf-i-corps-sites/>) recently to study the clinical interest in developing an alternative pharmaceutical approach to post-surgical inflammation treatment, as well as PCO prevention as opposed to its treatment with YAG capsulotomy. The goal of the project will be to determine the views of ophthalmologists on the need for such a treatment, what patient populations it would be appropriate for (pediatric versus age-related for instance), and what safety benchmarks the treatment would have to reach. We are looking to interview clinicians/attending physicians and/or residents. The interview/email survey will not take more than 15 min to complete. Your participation is voluntary. If you do not wish to participate, you may stop at any time. Responses will be confidential and your name will not appear anywhere in the final write up; I will assign you a pseudonym for any direct quotes used. There are minimal risks associated with this survey. Taking part in this survey is your agreement to participate.
