# Supplementary material
Source: PubMed Central journal article supplement (PMC6995282)
Supplement: NIHMS1547766-supplement-Supp_2.pdf [file NIHMS1547766-supplement-Supp_2.pdf]

# Supplemental 2

## Lens

[Post New Message](#)

[ARVO](#) [Renew my membership](#)

Mar 9, 2018

started 18 hours ago, [Melinda K Duncan](#) (0 replies)

[to all cataract surgeons](#) 

1. [Many of us in the lens community research the...](#) Melinda K Duncan

1. [to all cataract surgeons](#)

[Reply to Group](#)

[Reply to Sender](#)

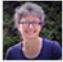

Mar 9, 2018 7:06 AM  
[Melinda K Duncan](#)

Many of us in the lens community research the sequelae of cataract surgery including post surgical inflammation and posterior capsular opacification. However, many of us are basic scientists who are interested in disease mechanisms but do not work on the clinical side of this problem. In order to bridge this gap, my research group wrote (and recently had funded) an NSF I-corps grant which seeks to interview cataract surgeons about their biggest clinical challenges in cataract surgery, and what the clinical safety/administration profile would need to look like before they would consider adding new anti-inflammatory and/or anti-PCO pharmaceutical based therapies to their treatment of patients.

If you are a cataract surgeon (or are in training to be a cataract surgeon) and would be willing to participate in our study via a short 15 minute phone call or on line questionnaire, please contact me at [rduncanm@udel.edu](mailto:rduncanm@udel.edu). Also, feel free to pass this request for information on to others... We are also planning on doing in person interviews on site at ARVO this year, but our grant requires that we have many done prior to May.

Best,

\_\_\_\_\_  
Melinda Duncan FARVO PhD  
Editorial Board Member, IOVS  
ARVO Trustee-lens  
Professor  
University of Delaware  
Newark, DE United States
